# Supplementary material
Source: publisher figshare collection journal article supplement (https://gsajournals.figshare.com/ndownloader/files/29157462)
Supplement: Supplementary file 1 [file 29157462]

Table S2. Strain-level breeding statistics for CC strains
strains	N_born	N_weaned	N_weaned_female	N_weaned_male	chrM	chrY	survival_rate	n_litters_per_strain	n_female_breeders	n_male_breeders	n_mating_units_per_strain	avg_litter_size	avg_litter_size_weaned	fract_productive	age_at_first_litter	n_litters_pair	fract_units_pair	N_born_pairs	N_weaned_pairs	survival_rate_pairs	fract_productive_pairs	avg_litter_size_pairs	avg_litter_size_weaned_pairs	age_at_first_litter_pair	interbirth_interval	n_litters_trio	fract_units_trio	N_born_trios	N_weaned_trios	survival_rate_trios	fract_productive_trios	avg_litter_size_trios	avg_litter_size_weaned_trios	age_at_first_litter_trios	n_litters_harem	fract_units_harem
CC001	2160	1714	780	935	B	G	0.793518519	347	164	89	89	5.790884718	5.389937107	0.831460674	80.21052632	48	0.168539326	284	238	0.838028169	0.866666667	5.916666667	5.409090909	88.15384615	34.14285714	291	0.820224719	1822	1428	0.783754116	0.674157303	5.765822785	5.368421053	78.74193548	8	0.011235955
CC002	3674	2871	1382	1489	G	F	0.781437126	944	309	194	200	3.692462312	3.629582807	0.82	94.08823529	108	0.215	403	356	0.88337469	0.674418605	3.697247706	3.787234043	78.86666667	24.66666667	828	0.78	3246	2494	0.768330253	0.67	3.697038724	3.609261939	97.51079137	8	0.005
CC003	445	359	149	210	E	D	0.806741573	133	50	35	35	3.272058824	3.094827586	0.942857143	87.12121212	70	0.571428571	234	197	0.841880342	1	3.295774648	3.078125	86.2	30.74	63	0.428571429	211	162	0.767772512	0.371428571	3.246153846	3.115384615	88.53846154	0	0
CC004	2047	1623	788	835	C	D	0.792867611	458	279	156	158	4.291404612	4.182989691	0.626582278	83.5049505	80	0.253164557	339	258	0.761061947	0.5	4.2375	4.095238095	86.8	35.62711864	361	0.721518987	1629	1316	0.807857581	0.474683544	4.298153034	4.204472843	82.2987013	17	0.025316456
CC005	1067	897	457	440	D	E	0.840674789	290	79	43	43	3.616949153	3.573705179	0.953488372	88.36585366	29	0.139534884	125	116	0.928	1	4.310344828	4.142857143	80.83333333	35.39130435	261	0.860465116	942	781	0.829087049	0.813953488	3.541353383	3.502242152	89.65714286	0	0
CC006	1733	1413	661	752	G	E	0.815349106	349	127	66	66	4.70923913	4.514376997	0.893939394	135.1166667	17	0.075757576	94	90	0.957446809	0.6	5.529411765	5.294117647	67	24.85714286	332	0.924242424	1639	1323	0.807199512	0.848484848	4.66951567	4.469594595	138.7017544	0	0
CC007	53	46	24	22	B	D	0.867924528	14	16	11	11	3.533333333	3.833333333	0.545454545	81.28571429	5	0.545454545	14	10	0.714285714	0.5	2.8	3.333333333	89.75	67	9	0.454545455	39	36	0.923076923	0.272727273	3.9	4	70	0	0
CC008	122	87	45	42	H	F	0.713114754	47	30	24	25	2.541666667	2.71875	0.56	85	26	0.72	71	55	0.774647887	0.5	2.730769231	2.619047619	85.88888889	39.41176471	21	0.28	51	32	0.62745098	0.2	2.318181818	2.909090909	83.4	0	0
CC009	969	768	327	441	E	C	0.792569659	272	172	105	105	3.448398577	3.622641509	0.876190476	79.42424242	101	0.39047619	350	282	0.805714286	0.926829268	3.465346535	3.525	80.175	44.34482759	160	0.580952381	585	459	0.784615385	0.485714286	3.482142857	3.731707317	78.82142857	11	0.028571429
CC010	2057	1528	762	766	A	C	0.742829363	494	228	128	128	3.986434109	3.664268585	0.78125	70.24038462	56	0.21875	215	150	0.697674419	0.642857143	3.839285714	3.571428571	62.28571429	38.34285714	438	0.78125	1842	1378	0.748099891	0.640625	4.004347826	3.674666667	72.25301205	0	0
CC011	552	476	256	220	E	C	0.862318841	114	72	39	39	4.677966102	4.448598131	0.769230769	82.19354839	5	0.102564103	29	21	0.724137931	0.5	5.8	5.25	89	27	109	0.897435897	523	455	0.86998088	0.717948718	4.628318584	4.417475728	81.72413793	0	0
CC012	2187	1934	909	1025	B	A	0.884316415	527	157	88	89	3.954792043	3.748062016	0.685393258	84.98360656	90	0.235955056	361	317	0.878116343	0.80952381	4.011111111	3.819277108	90.88235294	30.60273973	437	0.764044944	1826	1617	0.885542169	0.494382022	3.943844492	3.734411085	82.70454545	0	0
CC013	919	747	408	339	E	E	0.812840044	146	146	83	83	6.006535948	5.8359375	0.734939759	80.44927536	31	0.240963855	200	133	0.665	0.65	6.451612903	6.045454545	80.1875	37.73333333	115	0.759036145	719	614	0.853963839	0.578313253	5.893442623	5.79245283	80.52830189	0	0
CC015	1163	849	421	428	A	C	0.730008598	394	169	114	119	2.914786967	2.801980198	0.672268908	79.65591398	190	0.596638655	594	470	0.791245791	0.676056338	3.126315789	2.955974843	75.66037736	32.125	198	0.386554622	551	369	0.66969147	0.260504202	2.714285714	2.617021277	84.63157895	6	0.016806723
CC016	828	718	371	347	H	A	0.867149758	195	197	123	132	4.119402985	4.150289017	0.416666667	86.09836066	86	0.5	358	287	0.801675978	0.424242424	4.162790698	4.28358209	86.6969697	36.17307692	109	0.5	470	431	0.917021277	0.204545455	4.086956522	4.066037736	85.39285714	0	0
CC017	686	280	134	146	C	B	0.408163265	224	86	72	75	3.0625	2.61682243	0.693333333	83.08196721	174	0.813333333	513	205	0.399610136	0.68852459	2.948275862	2.530864198	79.57142857	39.17213115	50	0.186666667	173	75	0.433526012	0.133333333	3.46	2.884615385	97.41666667	0	0
CC018	1202	607	282	325	B	D	0.504991681	322	137	87	87	3.687116564	3.570588235	0.666666667	80.94202899	108	0.436781609	410	237	0.57804878	0.605263158	3.796296296	3.646153846	82.81481481	31.56790123	214	0.563218391	792	370	0.467171717	0.402298851	3.633027523	3.523809524	79.73809524	0	0
CC019	1475	1203	619	584	E	C	0.81559322	312	69	36	37	4.595015576	4.522556391	0.945945946	174.4054054	28	0.135135135	134	102	0.76119403	0.8	4.785714286	5.368421053	82.6	27.7826087	284	0.864864865	1341	1101	0.821029083	0.837837838	4.576791809	4.457489879	188.75	0	0
CC020	61	25	12	13	G	B	0.409836066	15	13	11	12	4.066666667	2.5	0.25	78.66666667	15	0.916666667	61	25	0.409836066	0.272727273	4.066666667	2.5	78.66666667	30.16666667	0	0.083333333	0	0	0	0	NaN	NaN	NaN	0	0
CC022	16	11	7	4	A	G	0.6875	3	3	3	3	5.333333333	5.5	0.333333333	179	3	1	16	11	0.6875	0.333333333	5.333333333	5.5	179	29	0	0	0	0	0	0	NaN	NaN	NaN	0	0
CC023	401	334	155	179	D	A	0.832917706	130	68	54	54	3.084615385	3.274509804	0.537037037	114.0909091	105	0.722222222	322	269	0.835403727	0.58974359	3.066666667	3.280487805	110.2692308	33.93670886	25	0.277777778	79	65	0.82278481	0.111111111	3.16	3.25	128.2857143	0	0
CC024	130	93	47	46	A	D	0.715384615	30	48	33	36	4.333333333	4.227272727	0.361111111	90.1875	13	0.583333333	47	36	0.765957447	0.238095238	3.615384615	4	86.42857143	41.66666667	17	0.416666667	83	57	0.686746988	0.222222222	4.882352941	4.384615385	93.11111111	0	0
CC025	2332	1578	798	780	F	D	0.676672384	461	184	105	105	4.97228145	4.60058309	0.838095238	77.0326087	94	0.238095238	437	303	0.693363844	0.8	4.64893617	4.52238806	84.76190476	29.04109589	367	0.761904762	1895	1275	0.672823219	0.647619048	5.053333333	4.619565217	74.74647887	0	0
CC026	1418	1094	606	488	F	E	0.771509168	380	176	101	102	3.654639175	3.879432624	0.803921569	82.12790698	85	0.294117647	287	212	0.738675958	0.766666667	3.376470588	3.593220339	89.69230769	31.66101695	292	0.68627451	1121	875	0.780553078	0.568627451	3.736666667	3.941441441	78.01694915	3	0.019607843
CC027	1275	1011	500	511	F	B	0.792941176	326	149	94	99	3.875379939	4.376623377	0.626262626	91.80821918	120	0.505050505	465	373	0.802150538	0.58	3.875	4.44047619	90.35294118	39.18823529	200	0.474747475	769	607	0.789336801	0.323232323	3.78817734	4.304964539	92.71052632	6	0.02020202
CC028	1280	1096	448	648	E	F	0.85625	264	107	64	64	4.58781362	4.683760684	0.8125	76.94545455	42	0.34375	163	128	0.785276074	0.590909091	3.880952381	4	77.9375	35.19230769	218	0.640625	1103	958	0.868540345	0.59375	4.733905579	4.838383838	76.94736842	4	0.015625
CC029	172	100	52	48	H	E	0.581395349	49	57	46	48	3.510204082	3.333333333	0.229166667	129.6666667	31	0.729166667	118	79	0.669491525	0.257142857	3.806451613	3.434782609	113.2	48.5	18	0.270833333	54	21	0.388888889	0.041666667	3	3	150.25	0	0
CC030	78	17	11	6	F	C	0.217948718	17	19	10	12	4.588235294	3.4	0.25	67.66666667	5	0.5	27	7	0.259259259	0.166666667	5.4	3.5	52.25	25	11	0.416666667	49	10	0.204081633	0.166666667	4.454545455	3.333333333	77.5	1	0.083333333
CC031	0	0	0	0	A/D	B	0	0	19	10	13	NaN	NaN	0	NaN	0	0.538461538	0	0	0	0	NaN	NaN	NaN	NaN	0	0.230769231	0	0	0	0	NaN	NaN	NaN	0	0.230769231
CC032	1168	927	291	636	A/D	G	0.793664384	273	79	47	47	4.216606498	3.978540773	0.85106383	86.07142857	81	0.319148936	367	308	0.839237057	0.866666667	4.530864198	4.463768116	84.64285714	34.56716418	192	0.680851064	801	619	0.77278402	0.574468085	4.086734694	3.774390244	86.78571429	0	0
CC033	79	47	22	25	F	H	0.594936709	22	13	9	10	3.590909091	3.615384615	0.7	68.88888889	16	0.7	56	35	0.625	0.857142857	3.5	3.5	66.33333333	31.8	6	0.3	23	12	0.52173913	0.1	3.833333333	4	74	0	0
CC035	937	825	388	437	F	A	0.880469584	250	111	71	75	3.688976378	3.767123288	0.8	90.140625	89	0.52	318	285	0.896226415	0.743589744	3.573033708	3.75	92.1	38.89830508	161	0.48	619	540	0.872374798	0.413333333	3.751515152	3.776223776	88.41176471	0	0
CC036	601	411	193	218	B	D	0.683860233	168	99	66	68	3.494186047	3.573913043	0.485294118	87.78947368	85	0.514705882	296	201	0.679054054	0.542857143	3.482352941	3.722222222	81	26.5483871	83	0.485294118	305	210	0.68852459	0.205882353	3.505747126	3.442622951	97.125	0	0
CC037	1541	1401	733	668	C	D	0.909149903	259	72	38	39	5.707407407	5.604	0.871794872	91.08823529	17	0.102564103	92	87	0.945652174	1	5.411764706	5.4375	86.75	51.76923077	242	0.897435897	1449	1314	0.906832298	0.769230769	5.727272727	5.615384615	91.66666667	0	0
CC038	130	66	26	40	C	F	0.507692308	44	29	20	20	2.954545455	3.142857143	0.55	82.29411765	29	0.65	95	48	0.505263158	0.615384615	3.275862069	3.2	78.5	37.89473684	10	0.25	28	18	0.642857143	0.15	2.8	3	78.2	5	0.1
CC040	1673	1112	507	605	D	H	0.664674238	392	167	86	86	4.080487805	4.028985507	0.755813953	74.50769231	14	0.081395349	40	14	0.35	0.285714286	2.857142857	2.333333333	65	19.25	378	0.918604651	1633	1098	0.672382119	0.73255814	4.123737374	4.066666667	74.80952381	0	0
CC041	1839	1702	889	813	A/D	E	0.925502991	344	94	50	50	5.122562674	4.976608187	0.9	158.4888889	21	0.1	112	107	0.955357143	1	5.333333333	5.35	82.6	39.125	314	0.88	1688	1567	0.928317536	0.78	5.130699088	4.99044586	170.3333333	9	0.02
CC042	1461	836	445	391	G	B	0.572210815	334	225	123	124	4.222543353	4.644444444	0.5	87.91111111	39	0.169354839	186	101	0.543010753	0.380952381	4.769230769	4.80952381	89.25	26.8	295	0.830645161	1275	735	0.576470588	0.435483871	4.153094463	4.622641509	87.70512821	0	0
CC043	1305	760	327	433	B	D	0.582375479	359	239	140	140	3.56557377	3.438914027	0.628571429	81.76767677	98	0.307142857	363	175	0.482093664	0.674418605	3.666666667	3.571428571	85	32.93846154	247	0.671428571	875	545	0.622857143	0.4	3.472222222	3.385093168	79.828125	14	0.021428571
CC044	222	120	55	65	C	G	0.540540541	83	61	49	49	2.674698795	2.5	0.387755102	93.28	66	0.755102041	181	101	0.55801105	0.432432432	2.742424242	2.525	96.1	24.31111111	17	0.244897959	41	19	0.463414634	0.06122449	2.411764706	2.375	82	0	0
CC045	7	7	4	3	H	G	1	2	5	5	5	3.5	3.5	0.4	94.5	2	0.8	7	7	1	0.5	3.5	3.5	94.5	NaN	0	0.2	0	0	0	0	NaN	NaN	NaN	0	0
CC046	25	17	11	6	G	B	0.68	6	12	7	7	4.166666667	3.4	0.285714286	113.5	5	0.285714286	22	14	0.636363636	0.5	4.4	3.5	65	22	1	0.714285714	3	3	1	0.142857143	3	3	162	0	0
CC051	2107	1800	895	905	A/D	C	0.854295206	279	137	72	72	7.023333333	6.94980695	0.736111111	67.90566038	22	0.083333333	145	136	0.937931034	0.833333333	6.590909091	6.476190476	74.6	35.64705882	257	0.916666667	1962	1664	0.848114169	0.666666667	7.057553957	6.991596639	67.20833333	0	0
CC055	149	110	56	54	G	C	0.738255034	47	60	45	45	3.170212766	2.820512821	0.444444444	90.45454545	27	0.666666667	77	53	0.688311688	0.4	2.851851852	2.523809524	90.92857143	27.07692308	20	0.333333333	72	57	0.791666667	0.177777778	3.6	3.166666667	89.625	0	0
CC057	119	79	32	47	F	E	0.663865546	49	22	16	16	2.428571429	2.821428571	0.625	108.9090909	25	0.625	69	54	0.782608696	0.6	2.76	3.176470588	110.8571429	37.58823529	24	0.375	50	25	0.5	0.25	2.083333333	2.272727273	105.5	0	0
CC058	701	501	277	224	C	F	0.714693295	184	136	86	88	3.708994709	3.88372093	0.477272727	76.56	65	0.431818182	231	165	0.714285714	0.421052632	3.553846154	3.837209302	90.76190476	31.22727273	119	0.568181818	470	336	0.714893617	0.295454545	3.790322581	3.906976744	66.27586207	0	0
CC059	1951	1856	968	888	A/D	C	0.951307022	311	209	126	128	5.984662577	5.948717949	0.7734375	71.64356436	45	0.3671875	258	246	0.953488372	0.574468085	5.733333333	5.720930233	73.32142857	34.11764706	261	0.625	1657	1577	0.951719976	0.5546875	6.003623188	5.950943396	71.06944444	5	0.0078125
CC060	1142	1062	455	607	E	B	0.929947461	247	197	113	115	4.513833992	4.617391304	0.747826087	89.81818182	30	0.27826087	163	160	0.981595092	0.5625	5.433333333	5.333333333	84.88888889	56.33333333	217	0.72173913	979	902	0.921348315	0.591304348	4.390134529	4.51	91.08571429	0	0
CC061	1580	1201	587	614	D	F	0.760126582	382	148	79	79	3.979848866	3.899350649	0.797468354	92.79032258	31	0.113924051	131	102	0.778625954	0.666666667	4.225806452	3.923076923	101.6666667	25.92	351	0.886075949	1449	1099	0.758454106	0.721518987	3.959016393	3.897163121	91.83928571	0	0
CC065	559	264	178	86	B	F	0.472271914	135	165	80	95	4.110294118	5.176470588	0.347368421	92	28	0.336842105	116	59	0.50862069	0.28125	4.142857143	4.538461538	79.72222222	41.5	78	0.568421053	337	169	0.50148368	0.2	4.265822785	5.451612903	97.92682927	29	0.094736842
CC068	1336	1000	463	537	G	B	0.748502994	371	224	130	130	3.452196382	3.558718861	0.576923077	77.85	50	0.276923077	198	145	0.732323232	0.388888889	3.96	4.264705882	72.375	35.61764706	321	0.723076923	1138	855	0.751318102	0.469230769	3.376854599	3.461538462	79.21875	0	0
CC070	2	0	0	0	G	E	0	1	2	1	1	2	NaN	0	149	0	0	0	0	0	NaN	NaN	NaN	NaN	NaN	1	1	2	0	0	0	2	NaN	149	0	0
CC074	86	73	34	39	G	D	0.848837209	26	37	29	32	3.307692308	3.65	0.28125	99	17	0.71875	62	53	0.85483871	0.347826087	3.647058824	3.785714286	96.125	26.88888889	9	0.28125	24	20	0.833333333	0.03125	2.666666667	3.333333333	110.5	0	0
CC075	596	486	242	244	E	A	0.815436242	175	89	68	70	3.367231638	3.261744966	0.485714286	82.54285714	112	0.742857143	351	270	0.769230769	0.480769231	3.133928571	3.068181818	79.65384615	32.39534884	63	0.257142857	245	216	0.881632653	0.128571429	3.769230769	3.540983607	90.88888889	0	0
CC078	74	62	32	30	A	E	0.837837838	24	19	15	15	3.083333333	2.818181818	0.266666667	84.75	24	0.733333333	74	62	0.837837838	0.363636364	3.083333333	2.818181818	84.75	33.4	0	0.266666667	0	0	0	0	NaN	NaN	NaN	0	0
CC079	400	254	119	135	A	H	0.635	105	57	41	41	3.80952381	3.68115942	0.43902439	72.43478261	41	0.56097561	142	94	0.661971831	0.304347826	3.463414634	3.357142857	62.1	26.16129032	64	0.43902439	258	160	0.620155039	0.268292683	4.03125	3.902439024	80.38461538	0	0
CC080	961	763	427	336	F	D	0.79396462	239	156	91	96	3.906504065	3.873096447	0.416666667	108.1190476	47	0.395833333	167	141	0.844311377	0.289473684	3.553191489	3.810810811	98.5	34	178	0.583333333	741	601	0.811066127	0.28125	4.027173913	3.902597403	109.25	14	0.020833333
CC084	781	686	372	314	NA	NA	0.878361076	164	133	76	78	4.676646707	5.00729927	0.653846154	88.52830189	36	0.320512821	167	149	0.892215569	0.52	4.638888889	4.966666667	90.78571429	36.81818182	125	0.666666667	602	527	0.875415282	0.474358974	4.703125	5.019047619	88.18421053	3	0.012820513
